# Supplementary material for: Changes in Aerosol/Gas-Phase Distribution Ratio of Semi-Volatile Products Affect Secondary Organic Aerosol Formation with NOx from α-Pinene Photooxidation
Source: Copernicus journal article supplement (doi:10.5194/egusphere-2024-1599), 2024-07-17
Supplement: Supplementary file 1 [file egusphere-2024-1599-supplement.pdf]

## **Supporting Information for:**

### **Changes in Aerosol/Gas-Phase Distribution Ratio of Semi-Volatile Products**

#### **Affect Secondary Organic Aerosol Formation with NO<sub>x</sub> from $\alpha$ -Pinene**

#### **Photooxidation**

**Shijie Liu<sup>1,2</sup>, Xinbei Xu<sup>1</sup>, Si Zhang<sup>1</sup>, Rongjie Li<sup>1</sup>, Zheng Li<sup>1</sup>, Can Wu<sup>1</sup>, Rui Li<sup>1</sup>,  
Guiqin Zhang<sup>2</sup>, and Gehui Wang<sup>1,3\*</sup>**

<sup>1</sup>Key Laboratory of Geographic Information Science of the Ministry of Education, School of Geographic Sciences, East China Normal University, Shanghai 200241, China

<sup>2</sup>Resources and Environment Innovation Institute, Shandong Jianzhu University, Jinan 250101, China

<sup>3</sup>Institute of Eco-Chongming, Cuinia Road, Chenjia Zhen, Chongming, Shanghai 202150, China

\*Correspondence to: Prof. Gehui Wang (ghwang@geo.ecnu.edu.cn)

***Content of the file***  
***Supplemental Figures S1-S5***

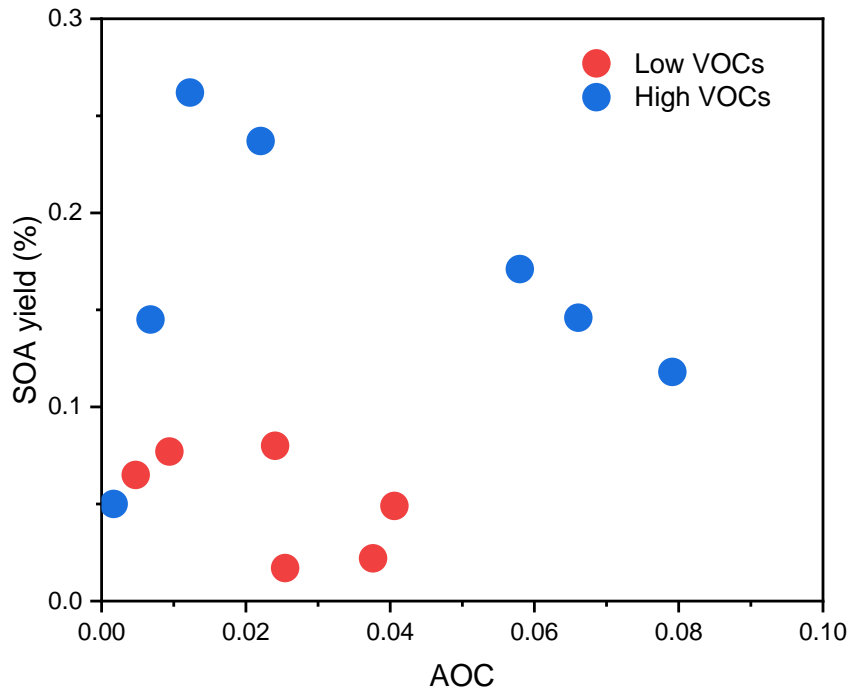

Figure S1 The relation of AOC with SOA yield under different experiment conditions

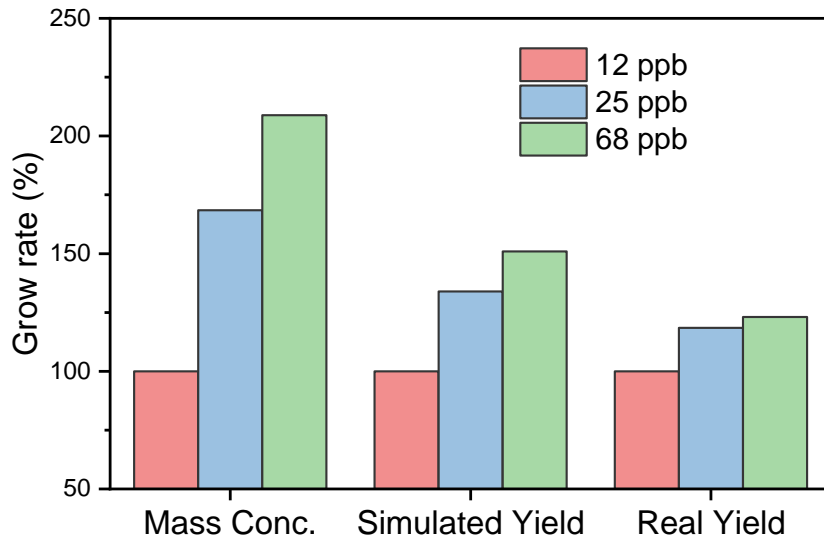

Figure S2 The grow rate of SOA mass concentration and SOA yield under low NO<sub>x</sub> conditions

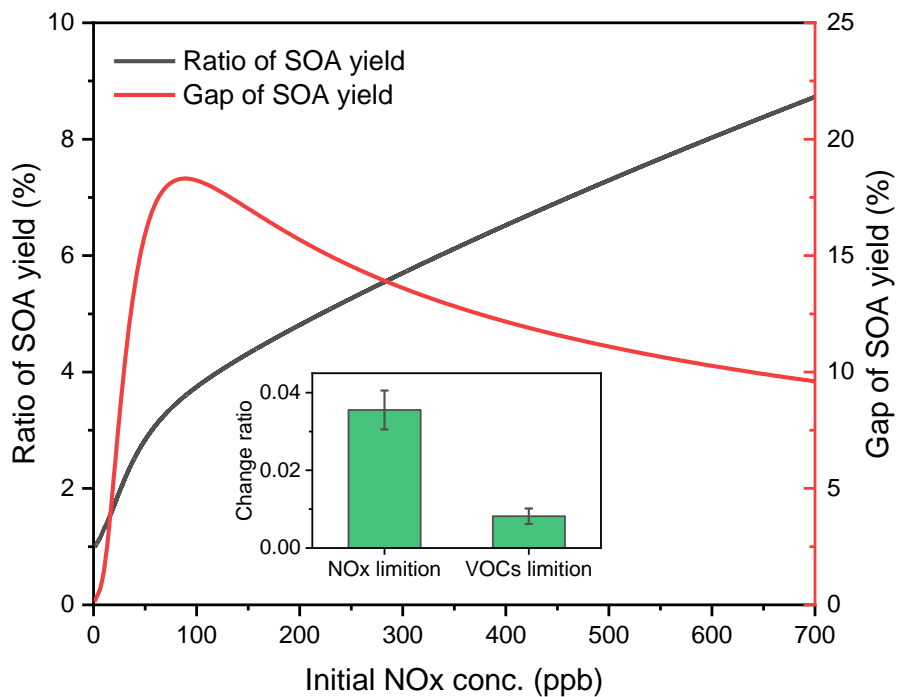

Figure S3 The evolution of the ratio and gap of SOA yield between low- and high-VOCs conditions with NOx.

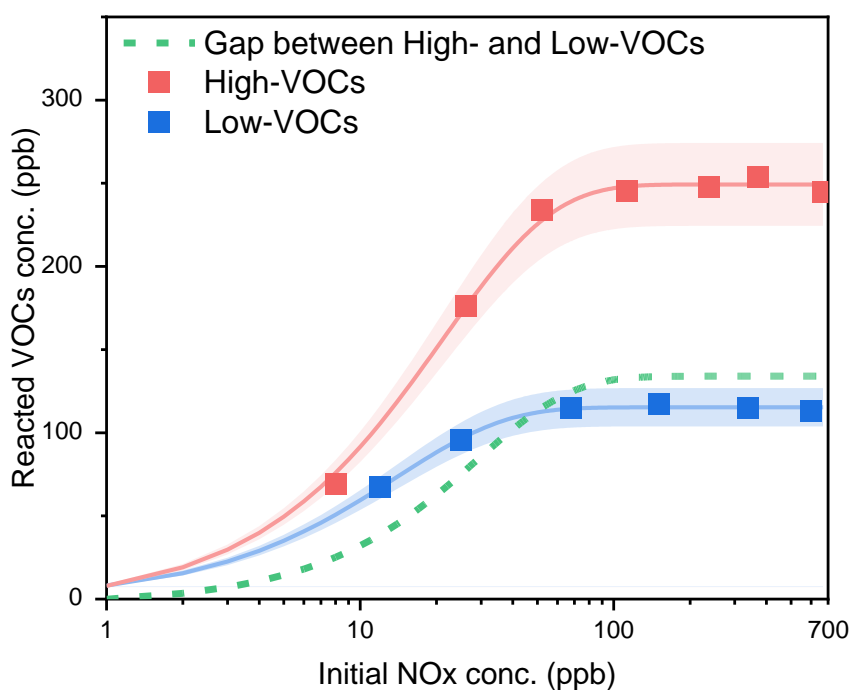

Figure S4 The consumption of VOCs under high- and low-VOCs conditions.

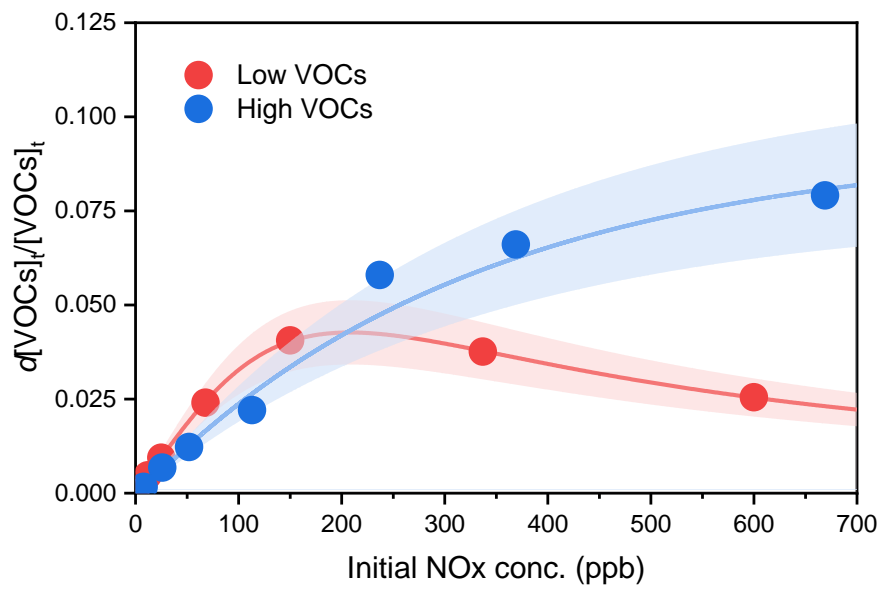

Figure S5 The variation of AOC with NOx under both low- and high-VOCs conditions.
